# Supplementary material for: Collaborating constructively for sustainable biotechnology
Source: PubMed Central journal article supplement (PMC6910968; doi:10.1038/s41598-019-54331-7), 2019-12-13
Supplement: 41598_2019_54331_MOESM1_ESM.pdf [file 41598_2019_54331_MOESM1_ESM.pdf]

# Collaborating constructively for sustainable biotechnology

Nicholas E Matthews, Carrie A Cizauskas, Donovan S Layton, Laurence Stamford, Philip Shapira

## Supplementary information

**Supplementary Figure 1:** Program structure for SustAssessR.

**Supplementary Figure 2:** Process model for cadaverine and putrescine production adapted from Kind and Wittman (2011).

**Supplementary Figure 3:** System boundary for monomer production.

**Supplementary Figure 4:** Summary of methodology for calculating total biorefinery costs.

**Supplementary Table 1:** Summary of different sustainability aspects introduced to the formulation workshops and the formulation survey with their associated average score given in the survey responses to the question: “In your opinion please score the following aspects of sustainability as to how significant they are for the biotechnology sector” (n=153). The relevant SDGs for each aspect are also listed.

**Supplementary Table 2:** Summary of Answers given in to the question: “How might the following sources of information influence your perspective of the sustainability of a product?” (n=137)

**Supplementary Table 3:** The CSS used to identify potential social risks/hotspots in the SHDB for each of the four production scenarios analysed in this report.

**Supplementary Table 4:** Selected individual indicator results for social category “Health & Safety”. Figures derived from the SHDB.

**Supplementary Table 5:** Selected individual indicator results for social category “Labor Rights & Decent Work”. Figures derived from the SHDB.

**Supplementary Table 6:** Deliberative engagement activities undertaken.

**Supplementary Table 7:** Parameterisations used to generate the process model.

**Supplementary Table 8:** Background data sources used in the environmental assessment.

**Supplementary Table 9:** Feedstock scenarios and their corresponding LCI data sources for agricultural production and processing to sugar.

**Supplementary Table 10:** LCI table of inputs for 1kg sugar production from harvested corn. Figures derived from Renouf et al. (2008).

**Supplementary Table 11:** LCI for processing of corn stover to sugar (glucose and xylose). Figures derived from two different NREL studies using a consistent base model. Background data sources are outlined in Supplementary Table 9.

**Supplementary Table 12:** Nylon types considered in analysis and their corresponding data sources.

**Supplementary Table 13:** Life-cycle inventory for HMDA production with associated Ecoinvent v3.3 dataset used for background data. Data marked with a \* denotes cut-off flows which were not modelled. Figures derived from Dros et al. (2015).

**Supplementary Table 14:** LCI at unit process level for cadaverine and putrescine production (separate excel file).

**Supplementary Table 15:** Aggregated LCI for cadaverine and putrescine production (separate excel file).

**Supplementary Table 16:** LCIA results for cadaverine and putrescine production (separate excel file).

**Supplementary Table 17:** Comparative LCIA results for different nylon types (separate excel file).

**Supplementary Table 18:** Hotspot results for cadaverine and putrescine production showing relative contributions of different process stages and background data (separate excel file).

**Supplementary Table 19:** Modelling parameters/assumptions used for costings model. Further details and full citations are provided in the methods.

**Supplementary Table 20:** Decision hierarchy for determining distributions for prices and costs.

**Supplementary Table 21:** Summary of price parameterisations used for costings model.

**Supplementary Table 22:** Full summary of MSP and cost breakdown results (separate excel file).

**Supplementary Table 23:** Sensitivity test results (separate excel file).

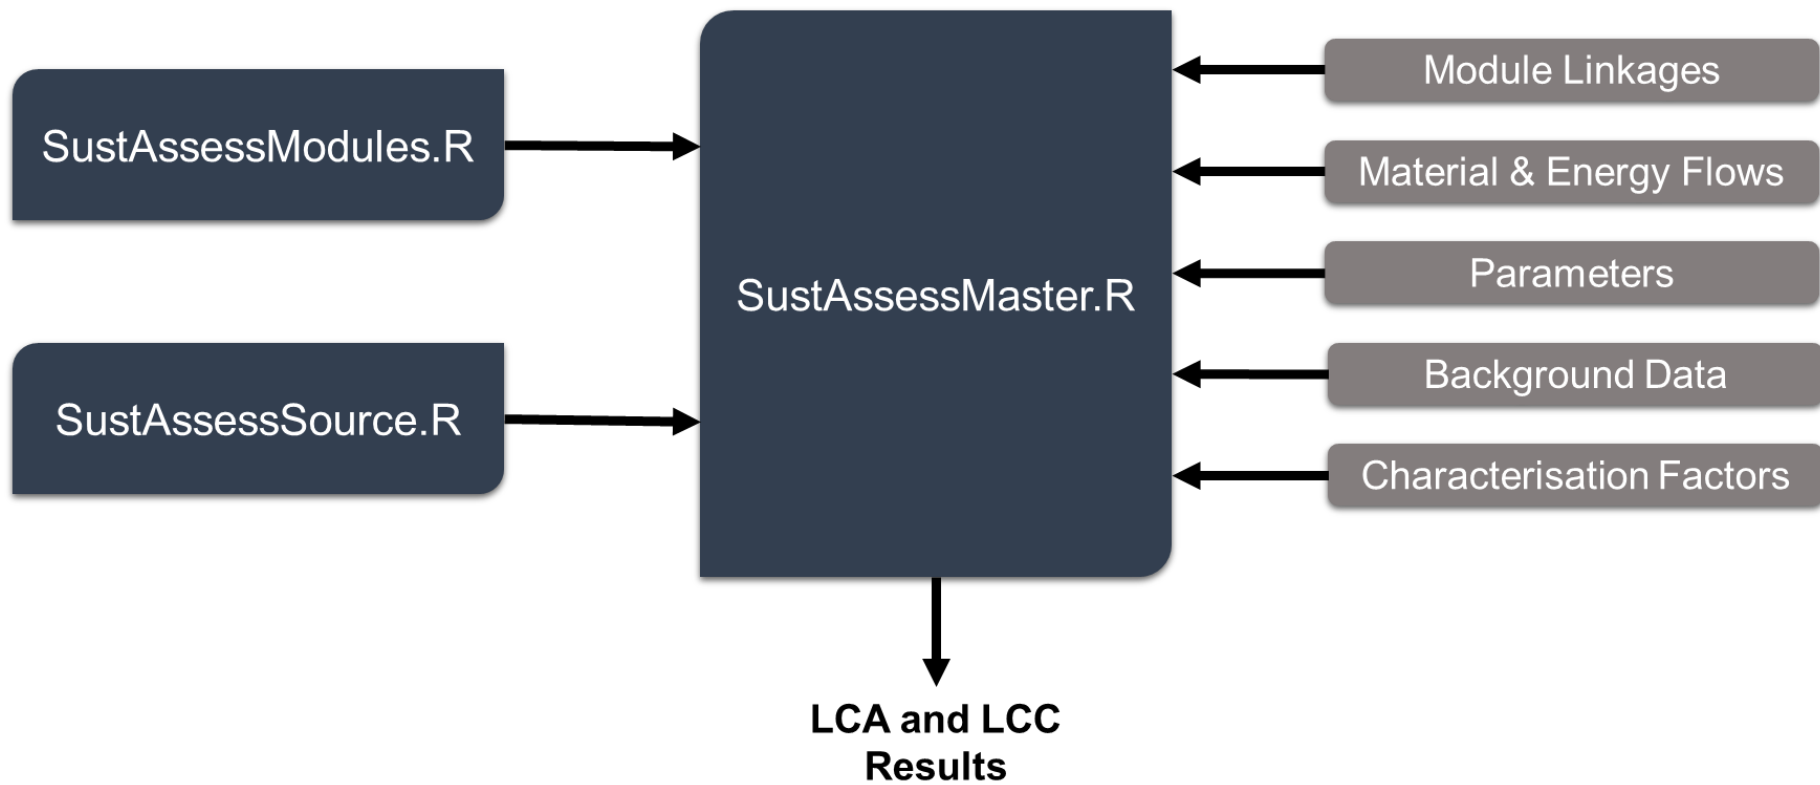

**Supplementary Figure 1:** Program structure for SustAssessR.

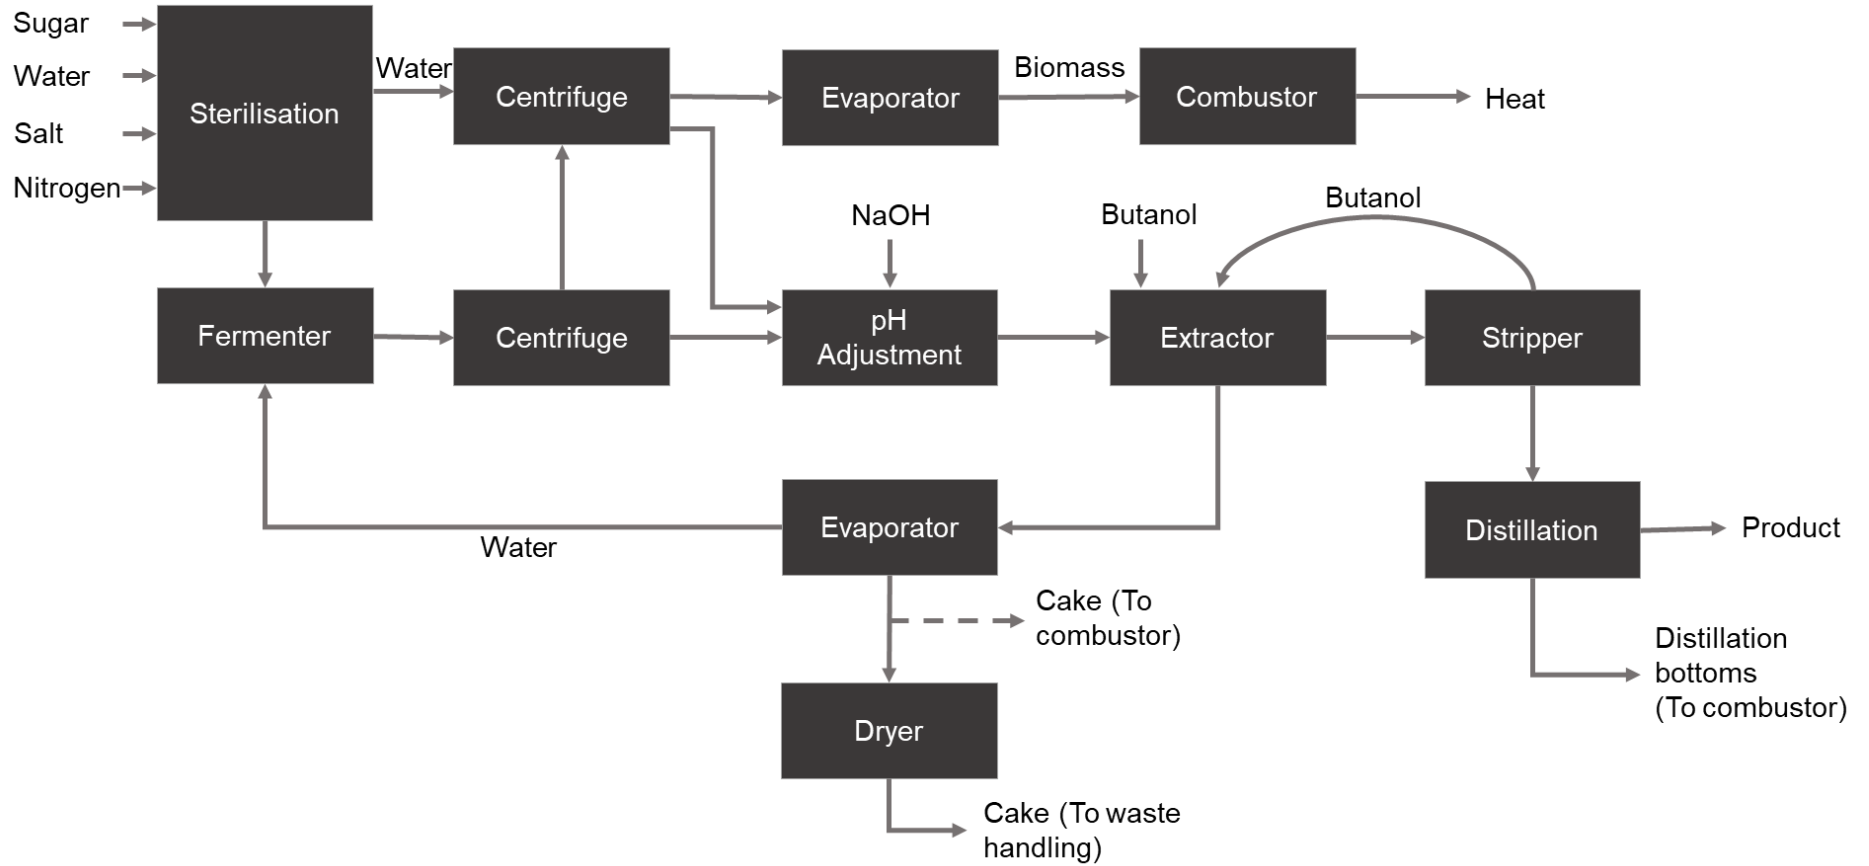

**Supplementary Figure 2:** Process model for cadaverine and putrescine production adapted from Kind and Wittman 2011.

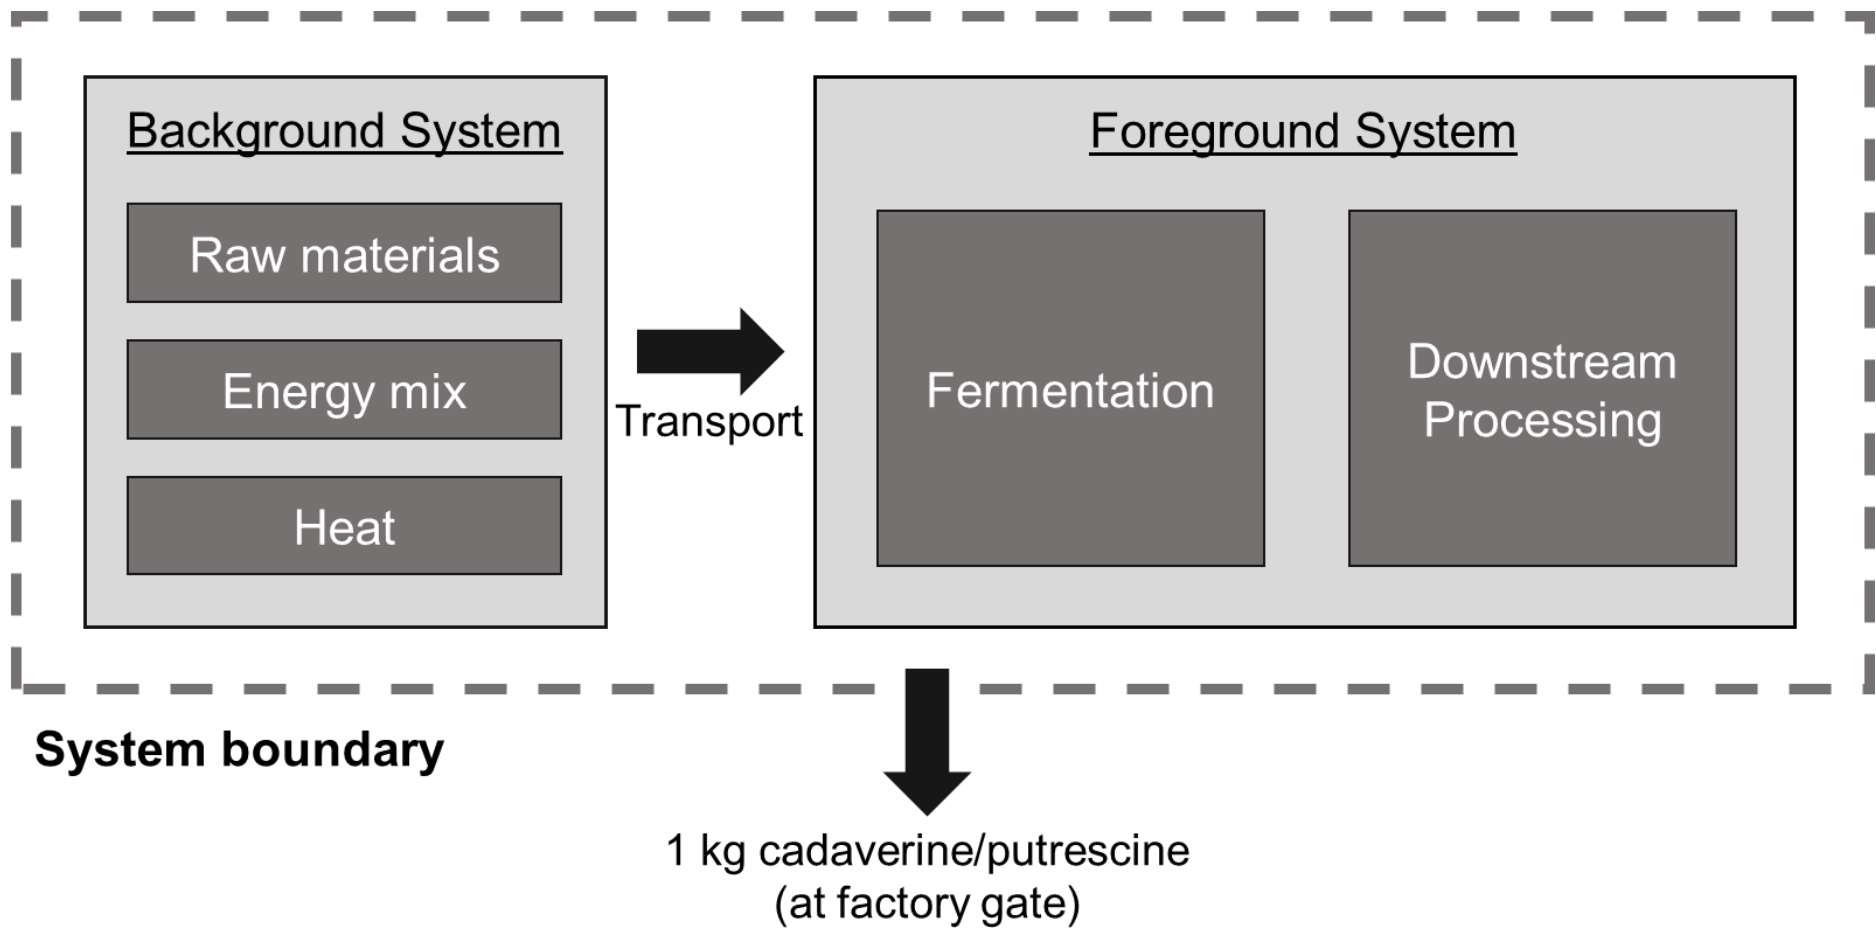

Supplementary Figure 3: System boundary for monomer production.

**Total capital investment (TCI)** = biorefinery cost \* ((# of fermenters/10) ^ scaling exponent (capital))

**Raw materials** = process model flows \* prices

**Utilities** = process model flows \* prices

**Waste** = process model flows \* prices

**Total labour** = labour cost \* ((# of fermenters/10) ^ scaling exponent (labour))

Maintenance = TCI \* maintenance rate

Tax = TCI \* tax rate

R&D and marketing costs = (total labour + tax + maintenance) \* R&D and marketing rate

Overheads = total labour\* overheads rate

**Other fixed operating costs** = maintenance + tax + R&D and marketing + overheads

**Supplementary Figure 4:** Summary of methodology for calculating total biorefinery costs.

| Sustainability Aspect                               | Average Score (1-5) | Relevant SDGs |
|-----------------------------------------------------|---------------------|---------------|
| <i>Tackling climate change</i>                      | 4.17                | 15            |
| <i>Improving the health of global ecosystems</i>    | 4.16                | 13,14         |
| <i>Promoting equality, peace, and justice</i>       | 2.99                | 4,5,10,16     |
| <i>Eliminating poverty, hunger, and poor-health</i> | 3.90                | 1,2,3,6,7     |
| <i>Sustaining employment and economic growth</i>    | 3.79                | 8,9,11        |

**Supplementary Table 1:** Summary of different sustainability aspects introduced to the formulation workshops and the formulation survey with their associated average score given in the survey responses to the question: “In your opinion please score the following aspects of sustainability as to how significant they are for the biotechnology sector” (n=153). The relevant SDGs for each aspect are also listed.

| Influence                     | Modeling data | Real-world data | Experts | Impacted stakeholders | Civil society organisations | Government resources |
|-------------------------------|---------------|-----------------|---------|-----------------------|-----------------------------|----------------------|
| <i>Not influential at all</i> | 2.19%         | 0.00%           | 1.46%   | 12.41%                | 7.30%                       | 5.11%                |
| <i>Slightly influential</i>   | 40.15%        | 6.57%           | 10.95%  | 38.69%                | 40.88%                      | 37.96%               |
| <i>Quite influential</i>      | 46.72%        | 31.39%          | 59.85%  | 27.01%                | 44.53%                      | 43.80%               |
| <i>Very influential</i>       | 10.95%        | 62.04%          | 27.74%  | 21.90%                | 7.30%                       | 13.14%               |

**Supplementary Table 2:** Summary of Answers given in to the question: “How might the following sources of information influence your perspective of the sustainability of a product?” (n=137)

| Production Scenario  | CSS Feedstock          | CSS Biorefinery                    |
|----------------------|------------------------|------------------------------------|
| <i>BR Sugarcane</i>  | Sugar cane, sugar beet | Chemical, rubber, plastic products |
| <i>FR Sugar Beet</i> | Sugar cane, sugar beet | Chemical, rubber, plastic products |
| <i>US Corn</i>       | Cereal grains nec      | Chemical, rubber, plastic products |
| <i>US Ligno</i>      | Cereal grains nec      | Chemical, rubber, plastic products |

**Supplementary Table 3:** The CSS used to identify potential social risks/hotspots for each of the four production scenarios analysed in this report.

| Social Theme                   | Indicator                                                                   | Brazil chemicals | Brazil sugarcane | France chemicals | France sugar beet | US chemicals | US cereals |
|--------------------------------|-----------------------------------------------------------------------------|------------------|------------------|------------------|-------------------|--------------|------------|
| Occupation injuries and deaths | Fatal injury rate by country                                                | High             | High             | Medium           | Medium            | Medium       | Medium     |
|                                | Fatal injury rate by sector                                                 | Very High        | Very High        | Medium           | High              | Medium       | Very High  |
|                                | Non-fatal injury rate by country                                            | Very High        | Very High        | Very High        | Very High         | Low          | Low        |
|                                | Non-fatal injury rate by sector                                             | Very High        | High             | Very High        | Very High         | Medium       | Medium     |
| Occupational toxins & hazards  | Overall risk of loss of life years by exposure to carcinogens in occupation | Medium           | Medium           | High             | High              | Medium       | Medium     |
|                                | Overall risk of workplace noise exposure, both genders                      | Medium           | Medium           | Low              | Low               | Low          | Low        |
|                                | Risk of loss of life years by airborne particulates in occupation           | High             | High             | Medium           | Medium            | Low          | Low        |

**Supplementary Table 4:** Selected individual indicator results for social category “Health & Safety”. Figures derived from the SHDB.



| Social Theme          | Indicator                                                                        | Brazil Chemicals | Brazil Sugarcane | France Chemicals | France Sugar Beet | US Chemicals | US Cereals |
|-----------------------|----------------------------------------------------------------------------------|------------------|------------------|------------------|-------------------|--------------|------------|
| Child labour          | Risk of child labour in sector, Total (Qual)                                     | Medium           | Medium           | No evidence      | No evidence       | Low          | Medium     |
|                       | Risk of child labour in sector, Total (Quant)                                    | Medium           | Very High        | No data          | No data           | No data      | No data    |
| Forced Labour         | Risk of forced labour by sector                                                  | High             | Very High        | Low              | Low               | Medium       | Medium     |
| Collective bargaining | Risk that country lacks or does not enforce Collective Bargaining rights         | Medium           | Medium           | Medium           | Medium            | Very High    | Very High  |
|                       | Risk that country lacks or does not enforce Freedom of Association rights        | High             | High             | Medium           | Medium            | High         | High       |
|                       | Risk that country lacks or does not enforce the right to strike                  | Medium           | Medium           | Medium           | Medium            | High         | High       |
| Labour laws           | Risk that country does not provide adequate labour laws by sector                | Medium           | Low              | Low              | Low               | Low          | Low        |
|                       | Risk that country does not ratify ILO conventions by sector                      | Low              | High             | Low              | Medium            | Medium       | Medium     |
|                       | Risk that minimum wage has not been updated                                      | Low              | Low              | Low              | Low               | Medium       | Medium     |
| Migrant Workers       | Risk that migrant workers are treated unfairly (qualitative)                     | Medium           | Medium           | Low              | Low               | Medium       | Medium     |
|                       | Risk that women are not accepted into the country as immigrants                  | Medium           | Medium           | Low              | Low               | Medium       | Medium     |
|                       | Risk that country does not pay immigrants enough for remittances                 | Medium           | Medium           | Medium           | Medium            | High         | High       |
| Poverty               | Risk of wages being under \$2 per day                                            | Medium           | Medium           | Low              | Low               | Low          | Low        |
| Unemployment          | Risk of unemployment in Country                                                  | Medium           | Medium           | High             | High              | High         | High       |
| Wage assessment       | Risk of sector average wage being lower than the country's minimum wage          | Low              | Very High        | Low              | Low               | Low          | High       |
|                       | Risk of sector average wage being lower than the country's non-poverty guideline | Low              | Very High        | Low              | Very High         | Low          | Medium     |
| Working time          | Risk of excessive working time by sector                                         | Low              | Low              | Medium           | Medium            | Medium       | Medium     |

**Supplementary Table 5:** Selected individual indicator results for social category “Labor Rights & Decent Work”. Figures derived from the SHDB.

| <b>Date</b> | <b>Activity</b> | <b>CSA Stage</b> | <b>Participants</b>       | <b>Number of Participants</b> | <b>Duration</b> | <b>Data collected</b>      |
|-------------|-----------------|------------------|---------------------------|-------------------------------|-----------------|----------------------------|
| August 2018 | Workshop        | Formulation      | Development team          | 4                             | 1 hour          | Notes, wordcloud responses |
| August 2018 | Workshop        | Formulation      | Legal team                | 4                             | 1 hour          | Notes, wordcloud responses |
| August 2018 | Workshop        | Formulation      | Business Development team | 8                             | 1 hour          | Notes, wordcloud responses |
| August 2018 | Workshop        | Formulation      | Manufacturing team        | 4                             | 1 hour          | Notes, wordcloud responses |
| August 2018 | Survey          | Formulation      | Company employees         | 137                           | N/A             | Survey responses           |
| March 2019  | Workshop        | Interpretation   | Development team          | 5                             | 1 hour          | Notes                      |
| March 2019  | Workshop        | Interpretation   | Legal team                | 6                             | 1 hour          | Notes                      |
| March 2019  | Workshop        | Interpretation   | Business Development team | 5                             | 1 hour          | Notes                      |
| March 2019  | Workshop        | Interpretation   | Modelling team            | 6                             | 1 hour          | Notes                      |
| March 2019  | Workshop        | Interpretation   | Products team             | 5                             | 1 hour          | Notes                      |
| March 2019  | Workshop        | Interpretation   | Manufacturing team        | 5                             | 1 hour          | Notes                      |
| August 2018 | Survey          | Interpretation   | Company employees         | 54                            | N/A             | Survey responses           |

**Supplementary Table 6:** Deliberative engagement activities undertaken.

| <b>Parameter</b>                         | <b>Value</b> | <b>Min</b> | <b>Max</b> | <b>Distribution</b> | <b>Units</b> | <b>Source</b>          | <b>Uncertainty Source</b> |
|------------------------------------------|--------------|------------|------------|---------------------|--------------|------------------------|---------------------------|
| <b>Energy Sterilisation</b>              | 0.1          | 0.1        | 0.1        | Triangular          | kg/kg        | Patel et al. 2006      | Patel et al. 2006         |
| <b>Energy Agitation Aeration</b>         | 3            | 1          | 5          | Triangular          | kwh/m3       | Patel et al. 2006      | Patel et al. 2006         |
| <b>Energy Centrifugation</b>             | 7            | 3.5        | 16         | Triangular          | kwh/m3       | Patel et al. 2006      | Patel et al. 2006         |
| <b>Drying Steam</b>                      | 1.5          | 0.95       | 1.67       | Triangular          | kg/kg        | Patel et al. 2006      | Patel et al. 2006         |
| <b>Evaporation Triple Effect (Steam)</b> | 0.4          | 0.3        | 0.5        | Triangular          | kg/kg        | Patel et al. 2006      | Patel et al. 2006         |
| <b>Water Content Biomass</b>             | 1.5          | 1.5        | 1.5        | None                | kg/kg        | Davis et al. 2013      | N/A                       |
| <b>Water Content Waste</b>               | 0.3          | 0.3        | 0.3        | None                | kg/kg        | Ecoinvent v3.3         | N/A                       |
| <b>Biomass to Heat</b>                   | 14.32        | 7.16       | 14.32      | Triangular          | MJ/kg        | Ecoinvent v3.3         | Default                   |
| <b>Annual operating time</b>             | 7900         | 7900       | 7900       | None                | hours        | Industry standard      | N/A                       |
| <b>Down time</b>                         | 12           | 6          | 24         | Triangular          | hours        | Assumed                | Default                   |
| <b>Solvent required</b>                  | 0.1          | 0.05       | 0.2        | Triangular          | kg/kg        | Krzyzaniak et al. 2013 | Default                   |
| <b>Solvent loss rate</b>                 | 1            | 0.5        | 2          | Triangular          | % per cycle  | Assumed                | Default                   |
| <b>Distillation efficiency</b>           | 23.8         | 11.9       | 47.6       | Triangular          | %            | Cavaletto 2013         | Default                   |
| <b>Polymerisation electricity</b>        | 2.7          | 2.7        | 5.4        | Triangular          | MJ/kg        | Plastics Europe 2014   | Default                   |
| <b>Polymerisation heat</b>               | 6.6          | 6.6        | 13.2       | Triangular          | MJ/kg        | Plastics Europe 2014   | Default                   |
| <b>Polymerisation transport</b>          | 0.2          | 0.1        | 0.4        | Triangular          | tkm/kg       | Assumed                | Default                   |

Supplementary Table 7: Parameterisations used to generate the process model. Further details and full citations are provided in the methods.

| <b>Background Data</b>       | <b>Data source</b> | <b>Dataset name</b>                                                                   | <b>Geographic specificity</b> | <b>Used in</b>                        |
|------------------------------|--------------------|---------------------------------------------------------------------------------------|-------------------------------|---------------------------------------|
| <i>Electricity - grid</i>    | Ecoinvent v3.3     | Market for electricity, medium voltage                                                | BR/FR/US                      | General                               |
| <i>Electricity - biomass</i> | Ecoinvent v3.3     | Heat and power co-generation, wood chips, 6667 kW, state-of-the-art 014               | BR/FR/US                      | General                               |
| <i>Heat - grid</i>           | Ecoinvent v3.3     | Steam production in chemical industry                                                 | RoW                           | General                               |
| <i>Heat - biomass</i>        | Ecoinvent v3.3     | Heat and power co-generation, wood chips, 6667 kW, state-of-the-art 014               | BR/FR/US                      | General                               |
| <i>Waste treatment</i>       | Ecoinvent v3.3     | Treatment of municipal solid waste, incineration                                      | RoW                           | General                               |
| <i>Combustion</i>            | Ecoinvent v3.3     | Heat production, softwood chips from forest, at furnace 5000kW, state-of-the-art 2014 | CH (with GLO background data) | General                               |
| <i>Water</i>                 | Ecoinvent v3.3     | Market for water, decarbonised, at user                                               | GLO                           | General                               |
| <i>Sodium Hydroxide</i>      | Ecoinvent v3.3     | Market for sodium hydroxide, without water, in 50% solution state                     | GLO                           | pH adjustment, corn stover processing |
| <i>Sodium Chloride</i>       | Ecoinvent v3.3     | Market for sodium chloride, powder                                                    | GLO                           | Fermenter                             |
| <i>Ammonium Sulfate</i>      | Ecoinvent v3.3     | Market for ammonium sulfate, a N                                                      | GLO                           | Fermenter, corn stover processing     |
| <i>Butanol</i>               | Ecoinvent v3.3     | Market for 1-butanol                                                                  | GLO                           | Extraction                            |
| <i>Corn Steep Liquor</i>     | USLCI              | Corn steep liquor                                                                     | RNA                           | Corn stover processing                |
| <i>SO2</i>                   | Ecoinvent v3.3     | Market for sulfur dioxide                                                             | RoW                           | Corn stover processing                |
| <i>Soybean Oil</i>           | Ecoinvent v3.3     | Market for soybean oil, refined                                                       | GLO                           | Corn stover processing                |
| <i>Ammonia</i>               | Ecoinvent v3.3     | Market for ammonia, liquid                                                            | RoW                           | Corn stover processing                |
| <i>Lime</i>                  | Ecoinvent v3.3     | Market for lime                                                                       | GLO                           | Corn stover processing                |
| <i>Sulfuric Acid</i>         | Ecoinvent v3.3     | Market for sulfuric acid                                                              | GLO                           | Corn stover processing                |
| <i>Fermentation plant</i>    | Ecoinvent v3.3     | Market for ethanol fermentation plant                                                 | GLO                           | General                               |
| <i>Transport</i>             | Ecoinvent v3.3     | Market for transport, freight, lorry, unspecified                                     | GLO                           | Polymerisation                        |

**Supplementary Table 8:** Background data sources used in the environmental assessment

| Feedstock Scenario   | Location      | Raw Feedstock | Sugar              | Agricultural data | Processing data    |
|----------------------|---------------|---------------|--------------------|-------------------|--------------------|
| <i>BR Sugarcane</i>  | Brazil        | Sugarcane     | Sucrose            | Ecoinvent v3.3    | Ecoinvent v3.3     |
| <i>FR Sugar Beet</i> | France        | Sugar beets   | Sucrose            | Ecoinvent v3.3    | Ecoinvent v3.3     |
| <i>US Corn</i>       | United States | Corn starch   | Glucose            | US LCI/NREL       | Renouf et al. 2008 |
| <i>US Ligno</i>      | United States | Corn stover   | Glucose and Xylose | US LCI/NREL       | NREL               |

**Supplementary Table 9:** Feedstock scenarios and their corresponding LCI data sources for agricultural production and processing to sugar.

| Input            | Amount   | Unit | Data Source (Ecoinvent v3.3)                                           |
|------------------|----------|------|------------------------------------------------------------------------|
| Corn             | 1.50E+00 | kg   | RNA: Corn, production, average, US, 2022                               |
| Electricity      | 9.34E-01 | MJ   | US: market group for electricity, medium voltage                       |
| Natural Gas      | 1.66E-01 | m3   | US: market for natural gas, high pressure                              |
| Chlorine         | 1.20E-05 | kg   | GLO: market for chlorine, liquid                                       |
| Cyclohexane      | 5.50E-05 | kg   | GLO: market for cyclohexane                                            |
| Lime             | 3.00E-04 | kg   | GLO: market for lime                                                   |
| Sodium chloride  | 6.50E-05 | kg   | GLO: market for sodium chloride, powder                                |
| Sodium hydroxide | 2.82E-04 | kg   | GLO: market for sodium hydroxide, without water, in 50% solution state |
| Sulfur dioxide   | 3.06E-03 | kg   | RoW: market for sulfur dioxide, liquid                                 |
| Sulfuric acid    | 4.50E-04 | kg   | GLO: market for sulfuric acid                                          |
| Urea             | 2.08E-04 | kg   | GLO: market for urea, as N                                             |

**Supplementary Table 10:** LCI table of inputs for 1kg sugar production from harvested corn. Figures derived from Renouf et al. (2008).

| <b>Inputs</b>                      | <b>Amount</b> | <b>Units</b> | <b>Source</b>                     |
|------------------------------------|---------------|--------------|-----------------------------------|
| Corn Stover                        | 1.04E+05      | kg           | NREL 2017 Biochemical Sugar Model |
| Sulfuric Acid                      | 2.24E+03      | kg           | NREL 2017 Biochemical Sugar Model |
| NaOH                               | 1.42E+03      | kg           | NREL 2017 Biochemical Sugar Model |
| Ammonia                            | 6.82E+02      | kg           | NREL 2017 Biochemical Sugar Model |
| Glucose                            | 1.21E+03      | kg           | NREL 2017 Biochemical Sugar Model |
| Corn Steep Liquor                  | 8.20E+01      | kg           | NREL 2017 Biochemical Sugar Model |
| Corn Oil (Modelled as soybean oil) | 7.00E+00      | kg           | NREL 2017 Biochemical Sugar Model |
| Water                              | 1.99E+05      | kg           | NREL 2017 Biochemical Sugar Model |
| Lime                               | 1.51E+02      | kg           | NREL 2017 Biochemical Sugar Model |
| SO <sub>2</sub>                    | 8.00E+00      | kg           | NREL 2017 Biochemical Sugar Model |
| Host Nutrients (Ammonium Sulfate)  | 3.40E+01      | kg           | NREL 2017 Biochemical Sugar Model |
| <b>Outputs</b>                     |               |              |                                   |
| Glucose                            | 3.03E+04      | kg           | Davis et al. 2015                 |
| Xylose                             | 1.67E+04      | kg           | Davis et al. 2015                 |
| Ash                                | 4.46E+03      | kg           | NREL 2017 Biochemical Sugar Model |
| Electricity                        | 1.41E+04      | kWh          | NREL 2017 Biochemical Sugar Model |
| <b>Emissions</b>                   |               |              |                                   |
| Carbon Dioxide                     | 7.47E+04      | kg           | Davis et al. 2015                 |
| Methane                            | 1.60E+00      | kg           | Davis et al. 2015                 |
| Nitrogen dioxide                   | 5.30E+01      | kg           | Davis et al. 2015                 |
| Carbon monoxide                    | 5.30E+01      | kg           | Davis et al. 2015                 |
| Sulfur dioxide                     | 1.10E+01      | kg           | Davis et al. 2015                 |

**Supplementary Table 11:** LCI for processing of corn stover to sugar (glucose and xylose). Figures derived from two different NREL studies using a consistent base model. Background data sources are outlined in Supplementary Table 9.

| Nylon Type        | Diamine    |                  | Dicarboxylic Acid |                 |
|-------------------|------------|------------------|-------------------|-----------------|
|                   | Name       | LCI Data Source  | Name              | LCI Data Source |
| <i>Nylon 6,6</i>  | HMDA       | Dros et al. 2015 | Adipic acid       | Ecoinvent v3.3  |
| <i>Nylon 4,6</i>  | Putrescine | This study       | Adipic acid       | Ecoinvent v3.3  |
| <i>Nylon 4,10</i> | Putrescine | This study       | Sebacic acid      | thinkstep       |
| <i>Nylon 5,10</i> | Cadaverine | This study       | Sebacic acid      | thinkstep       |

**Supplementary Table 12:** Nylon types considered in analysis and their corresponding data sources.

| Input             | Amount   | Units  | Data source (Ecoinvent v3.3)                      |
|-------------------|----------|--------|---------------------------------------------------|
| HCN               | 5.43E-01 | kg/kg  | GLO: market for hydrogen cyanide                  |
| Butadiene         | 5.45E-01 | kg/kg  | GLO: market for butadiene                         |
| NH3               | 1.75E-03 | kg/kg  | RoW: market for ammonia, liquid                   |
| Steam             | 8.46E+00 | kg/kg  | GLO: market for steam, in chemical industry       |
| Electricity       | 4.60E-01 | kwh/kg | GLO: market group for electricity, medium voltage |
| Fe-catalyst*      | 6.00E+00 | g/kg   | N/A                                               |
| Hydrogen          | 6.70E-02 | kg/kg  | RoW: market for hydrogen, liquid                  |
| Sodium bisulfite* | 1.09E-01 | kg/kg  | N/A                                               |
| Sodium sulfite    | 6.70E-02 | kg/kg  | GLO: market for sodium sulfite                    |
| Process water     | 1.23E+00 | kg/kg  | GLO: market for water, decarbonised, at user      |
| Inert gas*        | 1.00E-02 | L/kg   | N/A                                               |
| Cooling water*    | 2.72E-01 | m3/kg  | N/A                                               |

**Supplementary Table 13:** Life-cycle inventory for 1kg HMDA production with associated Ecoinvent v3.3 dataset used for background data. Data marked with a \* denotes cut-off flows which were not modelled. Figures derived from Dros et al. (2015).

| <b>Name</b>                        | <b>Distribution</b> | <b>Units</b> | <b>Mode</b> | <b>Min</b> | <b>Max</b> | <b>Source</b>                                        |
|------------------------------------|---------------------|--------------|-------------|------------|------------|------------------------------------------------------|
| <b>Tax Rate</b>                    | Uniform             | %            | N/A         | 0.7        | 3.0        | Davis et al. 2015 (Min)<br>Gargalo et al. 2016 (Max) |
| <b>Maintenance Rate</b>            | Uniform             | %            | N/A         | 3.0        | 6.0        | Davis et al. 2015 (Min)<br>Gargalo et al. 2016 (Max) |
| <b>R&amp;D and Marketing Costs</b> | Triangular          | %            | 6.0%        | 3.0        | 12.0       | Patel et al. 2006 (Mode)<br>Default uncertainty      |
| <b>Overheads Rate</b>              | Uniform             | %            | N/A         | 60.0       | 90.0       | Gargalo et al. 2016 (Min)<br>Davis et al. 2015 (Max) |
| <b>Interest Rate</b>               | Triangular          | %            | 8.0         | 4.0        | 16.0       | Davis et al. 2015 (Mode)<br>Default uncertainty      |
| <b>Income Tax Rate</b>             | none                | %            | 35.0        | N/A        | N/A        | Davis et al. 2015                                    |
| <b>Labour Scaling Factor</b>       | none                | exponent     | 0.25        | N/A        | N/A        | Patel et al. 2006                                    |
| <b>Capital Scaling Factor</b>      | none                | exponent     | 0.836       | N/A        | N/A        | Gallagher et al. 2006                                |
| <b>Discount Rate</b>               | Uniform             | %            | N/A         | 10.0       | 24.0       | Davis et al. 2015 (Min)<br>Gargalo et al. 2016 (Max) |
| <b>Loan Repayment Period</b>       | none                | years        | 10          | N/A        | N/A        | Davis et al. 2015                                    |

**Supplementary Table 19:** Modelling parameters/assumptions used for costings model. Further details and full citations are provided in the methods.



| <b>Grade</b>                  | <b>Modal Value</b>                                     | <b>Uncertainty range</b>                             |
|-------------------------------|--------------------------------------------------------|------------------------------------------------------|
| <i>1<sup>st</sup> (Best)</i>  | Average from historic price trend or literature figure | Historic price trend (specific) or literature figure |
| <i>2<sup>nd</sup></i>         | Estimate from literature/industry                      | Historic price trend (generic, US Gov)               |
| <i>3<sup>rd</sup></i>         | Estimate from literature/industry                      | Historic price trend (generic, Index Mundi)          |
| <i>4<sup>th</sup> (Worst)</i> | Estimate from literature                               | Generic estimate (double and half)                   |

**Supplementary Table 20:** Decision hierarchy for determining distributions for prices and costs.

| Parameter                    | Distribution | Value  | Min    | Max    | Units  | Figure Source          | Uncertainty Source      | Grade |
|------------------------------|--------------|--------|--------|--------|--------|------------------------|-------------------------|-------|
| <b>Sugar</b>                 | Triangular   | 0.37   | 0.20   | 0.65   | \$/kg  | Sugar #11 <sup>1</sup> | Sugar #11 <sup>1</sup>  | 1st   |
| <b>Lignocellulosic Sugar</b> | Triangular   | 0.41   | 0.20   | 0.81   | \$/kg  | NREL <sup>2</sup>      | Default                 | 4th   |
| <b>Butanol</b>               | Triangular   | 1.56   | 0.97   | 2.20   | \$/kg  | Gargalo et al. 2016    | Gargalo et al. 2016     | 1st   |
| <b>Salt</b>                  | Triangular   | 0.06   | 0.04   | 0.09   | \$/kg  | USGS <sup>3</sup>      | IndexMundi <sup>4</sup> | 3rd   |
| <b>Ammonium Sulfate</b>      | Triangular   | 0.59   | 0.42   | 0.66   | \$/kg  | USDA <sup>5</sup>      | USDA <sup>5</sup>       | 1st   |
| <b>Ammonium Nitrate</b>      | Triangular   | 0.62   | 0.44   | 0.69   | \$/kg  | USDA <sup>5</sup>      | USDA <sup>5</sup>       | 1st   |
| <b>Corn Steep Liquor</b>     | Triangular   | 0.08   | 0.05   | 0.08   | \$/kg  | Davis et al. 2015      | USDA <sup>5</sup>       | 2nd   |
| <b>Sodium Hydroxide</b>      | Triangular   | 0.20   | 0.14   | 0.22   | \$/kg  | Davis et al. 2015      | IndexMundi <sup>4</sup> | 3rd   |
| <b>Electricity</b>           | Triangular   | 0.07   | 0.06   | 0.07   | \$/kWh | EIA <sup>7</sup>       | EIA <sup>7</sup>        | 1st   |
| <b>Steam</b>                 | Triangular   | 0.44   | 0.15   | 0.64   | ¢/kg   | Gargalo et al. 2016    | IndexMundi <sup>8</sup> | 3rd   |
| <b>Water</b>                 | Triangular   | 0.05   | 0.03   | 0.07   | ¢/kg   | Gargalo et al. 2016    | IndexMundi <sup>4</sup> | 3rd   |
| <b>Wastewater treatment</b>  | Triangular   | 0.05   | 0.03   | 0.11   | ¢/kg   | Gargalo et al. 2016    | Default                 | 4th   |
| <b>Waste management</b>      | Triangular   | 0.04   | 0.02   | 0.07   | \$/kg  | Gargalo et al. 2016    | Default                 | 4th   |
| <b>Capital Cost of Plant</b> | Triangular   | 370.28 | 185.14 | 740.56 | m\$    | Tsagkari et al. 2016   | Default                 | 4th   |
| <b>Labour Cost</b>           | Triangular   | 3.66   | 1.83   | 7.32   | m\$/yr | Davis et al. 2015      | Default                 | 4th   |

**Supplementary Table 21:** Summary of price parameterisations used for costings model.

<sup>1</sup> <https://www.indexmundi.com/commodities/?commodity=sugar&months=120>

<sup>2</sup> <https://www.nrel.gov/extranet/biorefinery/aspden-models/downloads/bc1707a/sugar-model-readme.pdf>

<sup>3</sup> <https://minerals.usgs.gov/minerals/pubs/commodity/salt/mcs-2015-salt.pdf>

<sup>4</sup> <https://www.indexmundi.com/commodities/?commodity=industrial-inputs-price-index&months=120>

<sup>5</sup> <https://www.ers.usda.gov/data-products/fertilizer-use-and-price.aspx>

<sup>7</sup> <https://www.eia.gov/electricity/data.php>

<sup>8</sup> <https://www.indexmundi.com/commodities/?commodity=energy-price-index&months=180>
